# Supplementary material
Source: Springer Nature journal article supplement (https://www.springermedizin.de/resource/supplementary/13002_2010_226_MOESM1_ESM.pdf/9627422)

# ASSAM

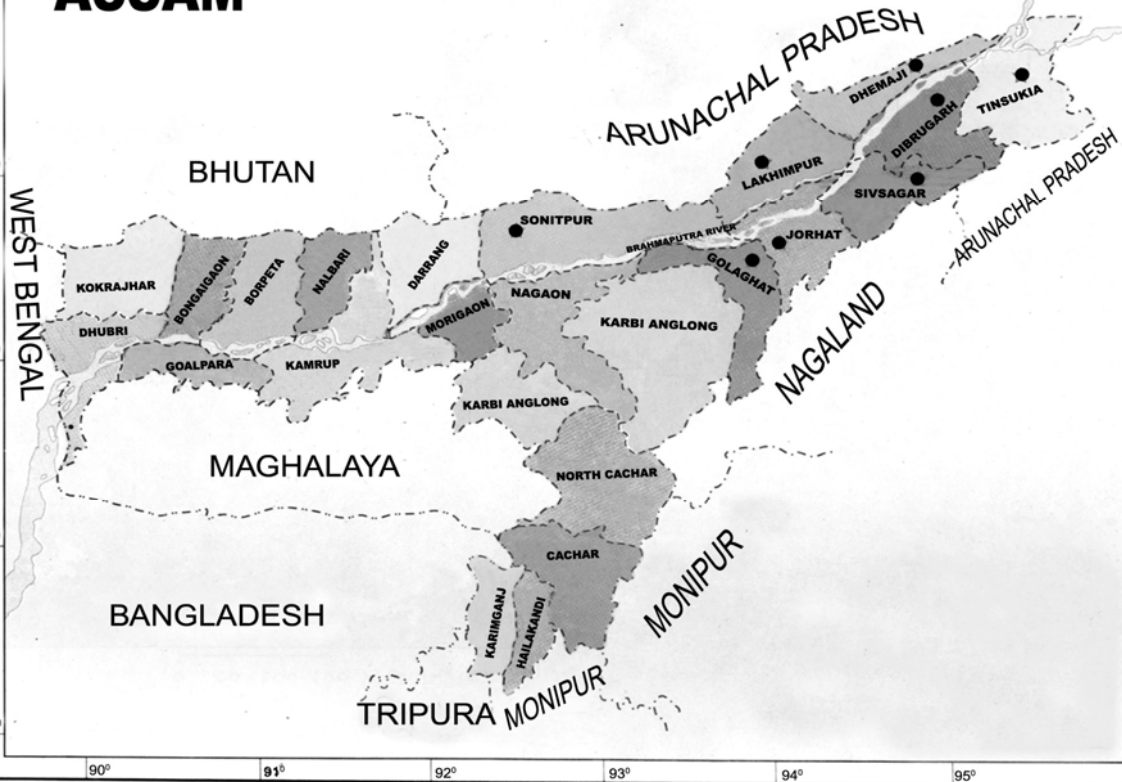

Supplement: MOESM1 [file 9627422]
